# Supplementary material
Source: Research Square preprint supplement (doi:10.21203/rs.3.rs-9147742/v1)
Supplement: Supplementary file 1 [file b8098ac1776af9e31ee085b3.pdf]

Treefall risk assessment in an urban green area for a hypothetical 30-year return period storm using damage data from Typhoons Faxai and Hagibis in 2019

Kohei Katayama, Yukira Mochida and Fumito Koikea

### Supporting Material 3

Effects of maximum compressive stress and tree types on treefall probability. Standard deviation represents those of posterior distribution of parameters. “Conifer - Broad leaved” represents posterior distribution of subtracts of parameters for two tree types.

| Variable                          | Estimate              | Standard deviation    |    |
|-----------------------------------|-----------------------|-----------------------|----|
| Intercept                         | -9.52                 | 0.86                  | ** |
| Max compressive stress            | $1.58 \times 10^{-7}$ | $0.17 \times 10^{-7}$ | ** |
| Tree type                         |                       |                       |    |
| Broadleaved                       | -1.15                 | 0.74                  | +  |
| Conifer                           | 1.14                  | 0.74                  | +  |
| Test for difference of parameters |                       |                       |    |
| Conifer - Broadleaved             | 2.08                  | 0.50                  | ** |

\*\* P<0.01, + P<0.10

## Supporting Material 4

Predicted number of trees belonging to treefall probability classes in the strongest storm in next 30 years. Figures in parenthesis represent percentage. Please note that number includes trees fallen by Typhoons in 2019.

|                                                         | Treefall probability |               |              |               | Sum            |
|---------------------------------------------------------|----------------------|---------------|--------------|---------------|----------------|
|                                                         | 0 - 10%              | 10 - 30%      | 30 - 50%     | 50 - 100%     |                |
| Conifers                                                | 361<br>(63.3)        | 147<br>(25.8) | 36<br>(6.3)  | 26<br>(4.6)   | 570<br>(100)   |
| <i>Cinnamomum camphora</i>                              | 644<br>(71.3)        | 108<br>(12.0) | 47<br>(5.2)  | 104<br>(11.5) | 903<br>(100)   |
| <i>Castanopsis sieboldii</i><br>subsp. <i>sieboldii</i> | 1247<br>(95.6)       | 44<br>(3.4)   | 7<br>(0.5)   | 6<br>(0.5)    | 1304<br>(100)  |
| Native sub-canopy trees                                 | 806<br>(99.6)        | 2<br>(0.2)    | 0<br>(0.0)   | 1<br>(0.1)    | 809<br>(100)   |
| Others                                                  | 9627<br>(93.3)       | 396<br>(3.8)  | 105<br>(1)   | 189<br>(1.8)  | 10317<br>(100) |
| Sum                                                     | 12685<br>(91.2)      | 697<br>(5)    | 195<br>(1.4) | 326<br>(2.3)  | 13903<br>(100) |

## Supporting Material 5

Expected number of trees belonging to treefall energy classes in the strongest storm in next 30 years. Figures in parenthesis represent percentage. Please note that number includes trees fallen by Typhoons in 2019.

|                                                         | Expected treefall energy (kJ) |              |             | Sum            |
|---------------------------------------------------------|-------------------------------|--------------|-------------|----------------|
|                                                         | 0 - 31.6                      | 31.6 - 100   | 100 - 316   |                |
| Conifers                                                | 539<br>(94.6)                 | 23<br>(4.0)  | 8<br>(1.4)  | 570<br>(100)   |
| <i>Cinnamomum camphora</i>                              | 771<br>(85.4)                 | 83<br>(9.2)  | 49<br>(5.4) | 903<br>(100)   |
| <i>Castanopsis sieboldii</i><br>subsp. <i>sieboldii</i> | 1298<br>(99.5)                | 6<br>(0.5)   | 0<br>(0.0)  | 1304<br>(100)  |
| Native sub-canopy trees                                 | 809<br>(100)                  | 0<br>(0.0)   | 0<br>(0.0)  | 809<br>(100)   |
| Others                                                  | 10271<br>(99.6)               | 46<br>(0.4)  | 0<br>(0.0)  | 10317<br>(100) |
| Sum                                                     | 13688<br>(98.5)               | 158<br>(1.1) | 57<br>(0.4) | 13903<br>(100) |
